# Supplementary material for: SERS-PLSR Analysis of Vaginal Microflora: Towards the Spectral Library of Microorganisms
Source: MDPI journal article supplement (doi:10.3390/ijms232012576), 2022-10-20
Supplement: s1 [file s1]

# Supplementary information

## SERS-PLSR Analysis of Vaginal Microflora: Towards the Spectral Library of Microorganisms

Sylwia Magdalena Berus <sup>1,\*†</sup>, Monika Adamczyk-Popławska <sup>2,†</sup>, Katarzyna Goździk <sup>3</sup>, Grażyna Przedpeńska <sup>4</sup>, Tomasz R. Szyborski <sup>1</sup>, Yuriy Stepanenko <sup>1</sup> and Agnieszka Kamińska <sup>1,\*</sup>

<sup>1</sup> Institute of Physical Chemistry, Polish Academy of Sciences, Kasprzaka 44/52, 01-224 Warsaw, Po-land

<sup>2</sup> Department of Molecular Virology, Faculty of Biology, University of Warsaw, Miecznikowa 1, 02-096 Warsaw, Poland

<sup>3</sup> Department of Parasitology, Faculty of Biology, University of Warsaw, Miecznikowa 1, 02-096 Warsaw, Poland

<sup>4</sup> Department of Dermatology and Venerology, Infant Jesus Clinical Hospital, Koszykowa 82a, 02-008 Warsaw, Poland

\* Correspondence: sberus@ichf.edu.pl (S.M.B.); akaminska@ichf.edu.pl (A.K.)

† These authors contributed equally to this work.

### 1. Tables

**Table S1.** The set of percentage explained information for three first components for different associations.

| Association                             | Factor-1 |          | Factor-2 |          | Factor-3 |          | Total      |            |
|-----------------------------------------|----------|----------|----------|----------|----------|----------|------------|------------|
|                                         | X-matrix | Y-matrix | X-matrix | Y-matrix | X-matrix | Y-matrix | X-matrix   | Y-matrix   |
| <i>Fanyhessea vaginae</i>               | 52%      | 16%      | 17%      | 16%      | 12%      | 15%      | <b>81%</b> | <b>47%</b> |
| <i>Prevotella bivia</i>                 | 53%      | 16%      | 18%      | 16%      | 9%       | 16%      | <b>80%</b> | <b>48%</b> |
| <i>Candida albicans</i><br><i>dHp17</i> | 69%      | 13%      | 11%      | 15%      | 6%       | 16%      | <b>86%</b> | <b>44%</b> |
| <i>Candida glabrata</i>                 | 87%      | 19%      | 4%       | 13%      | 3%       | 13%      | <b>94%</b> | <b>45%</b> |

**Table S2.** Growth conditions and selected culture media for analyzed microorganisms

| <b>Microorganism</b>              | <b>Culture medium</b>                   | <b>Conditions</b>                           |
|-----------------------------------|-----------------------------------------|---------------------------------------------|
| <i>Lactobacillus</i> spp.         | MRS                                     | anaerobic conditions at 37 °C for 48h       |
| <i>Bifidobacterium</i> spp.       | MRS                                     | anaerobic conditions at 37 °C for 48h       |
| <i>Streptococcus agalactiae</i>   | Chocolate agar                          | anaerobic conditions at 37 °C for 48h       |
| <i>Gardnerella vaginalis</i>      | MRS, RCM, TSA, Chocolate agar           | anaerobic conditions at 37 °C for 48h       |
| <i>Atopobium vaginae</i> ,        | MRS, RCM, TSA                           | anaerobic conditions at 37 °C for 48h       |
| <i>Prevotella bivia</i>           | MRS, TSA, Chocolate agar                | anaerobic conditions at 37 °C for 48h       |
| <i>Finegoldia magna</i> ,         | MRS, RCM, TSA, Chocolate agar           | anaerobic conditions at 37 °C for 48h       |
| <i>Mobiluncus mulieris</i> ,      | MRS, RCM, TSA, Chocolate agar           | anaerobic conditions at 37 °C for 48h       |
| <i>Mobiluncus curtisii</i> ,      | MRS, RCM, TSA, Chocolate agar           | anaerobic conditions at 37 °C for 48h       |
| <i>Aerococcus tetradus</i> ,      | MRS, RCM, TSA                           | anaerobic conditions at 37 °C for 48h       |
| <i>Anaerococcus christensenii</i> | MRS, RCM, TSA                           | anaerobic conditions at 37 °C for 48h       |
| <i>Candida</i> spp.               | YPD medium                              | aerobic conditions at 37 °C for 24h         |
|                                   | MRS medium                              | aerobic conditions at 37 °C for 48h         |
| <i>Trichomonas vaginalis</i>      | L.Y.I. Entamoeba medium (ATCC-PRA-2154) | microaerophilic conditions at 35 °C for 48h |

## 2. Figures

### A Bacterial pathogens

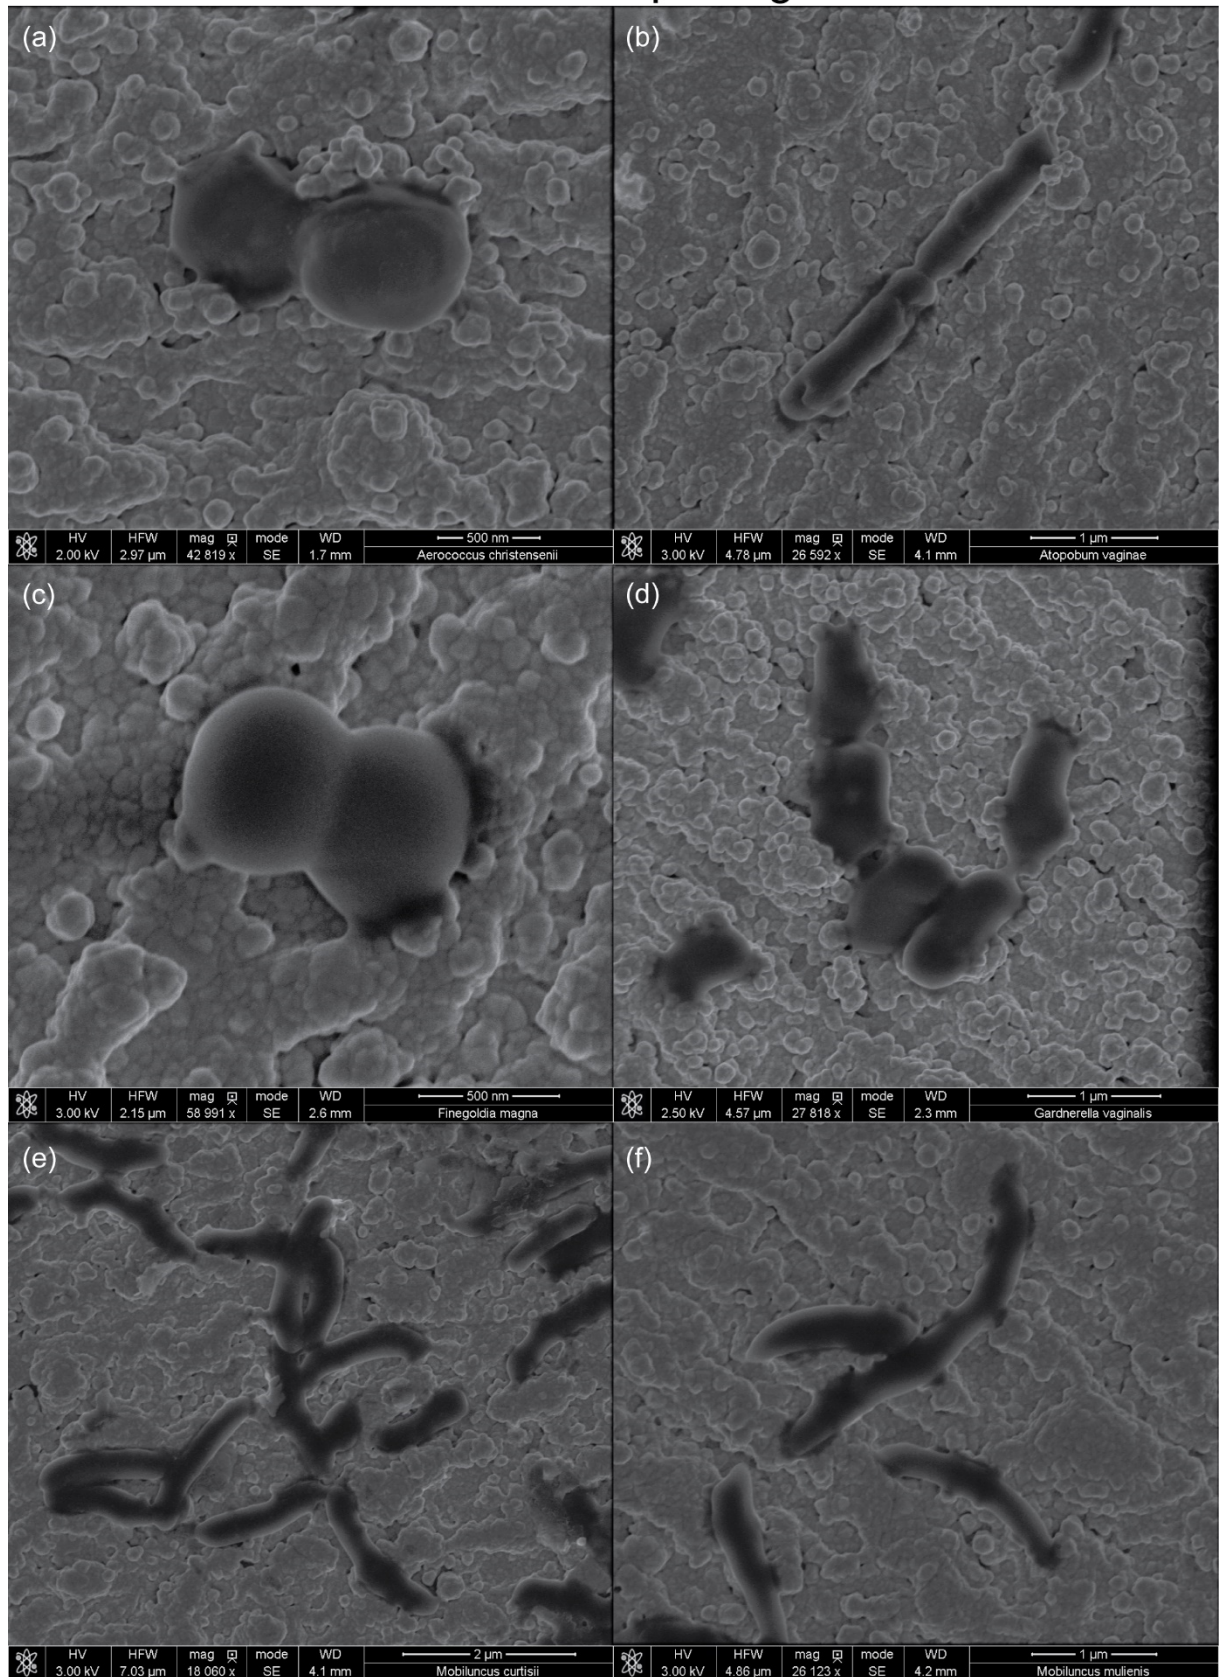

B

*Lactobacillus* spp.

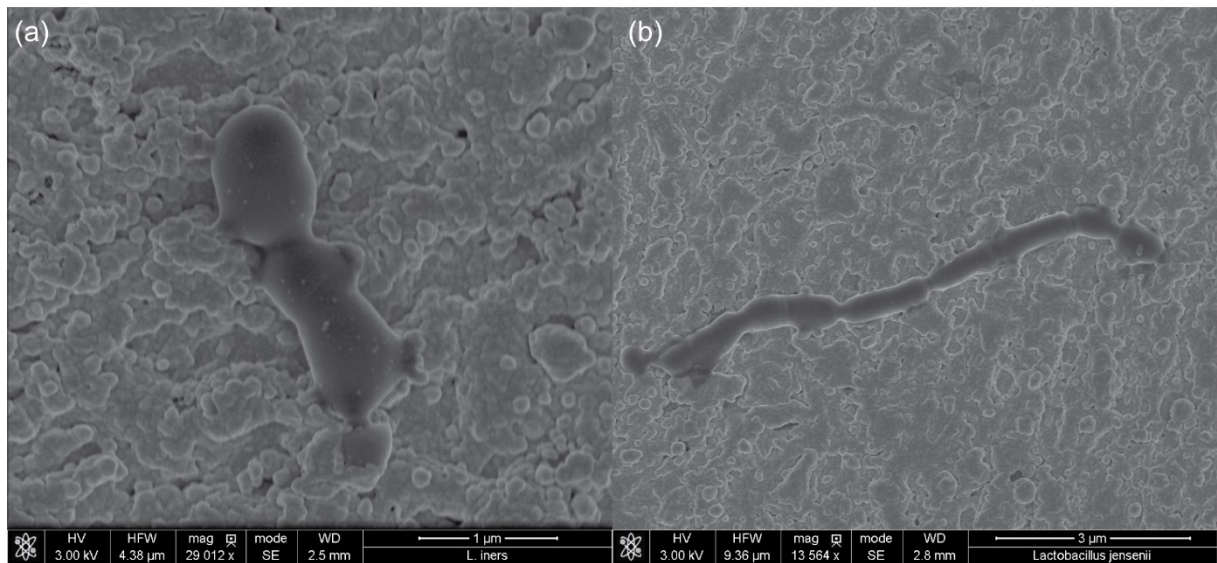

C

*Bifidobacterium* spp.

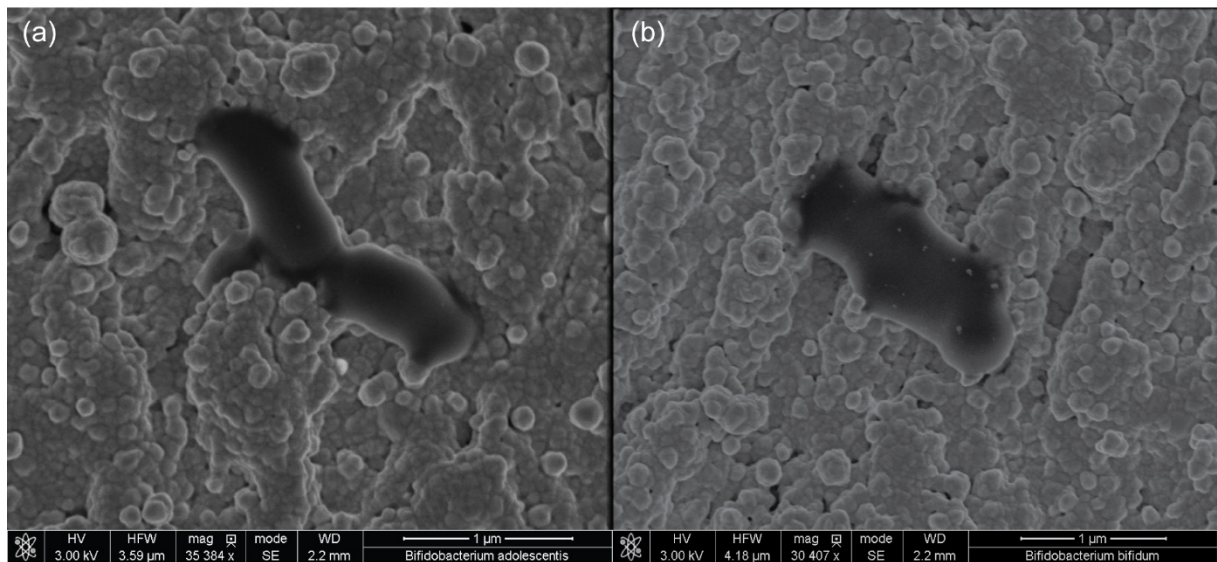



D

*Candida* spp.

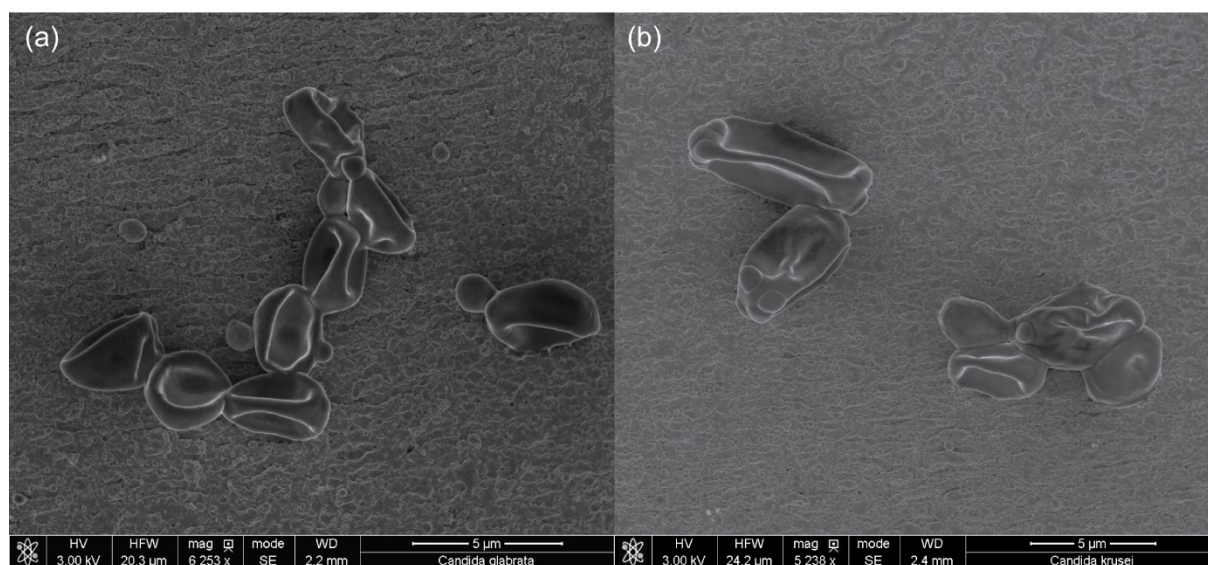

**Figure S1.** The SEM images of **A** bacterial pathogens a) *Aerococcus christensenii*, b) *Atopobium vaginae*, c) *Finnegoldia magna*, d) *Gardnerella. vaginalis*, e) *Mobiluncus curtisii*, f) *Mobiluncus mulieris*; **B** *Lactobacillus* spp. a) *Lactobacillus iners*, b) *Lactobacillus jensenii*; **C** *Bifidobacetrum* spp. a) *Bifidobacterium adolescentis*, b) *Bifidobacterium bifidum*; **D** *Candida* spp. a) *Candida glabrata*, b) *Candida krusei* which are placed onto the Si/Ag SERS platforms.

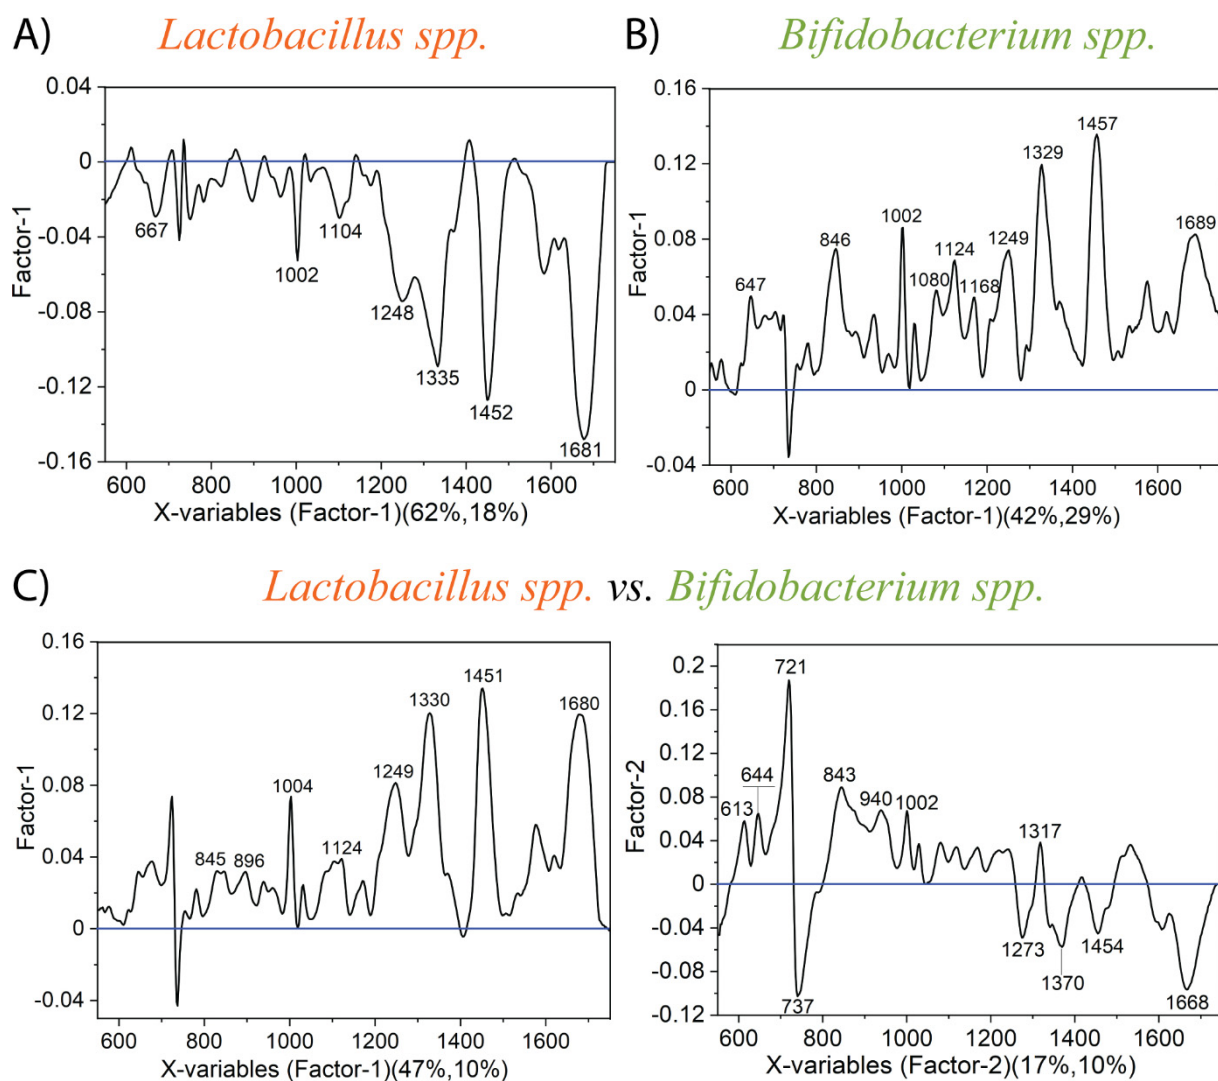

**Figure S2.** X-loadings plots for different associations (A) *Lactobacillus spp.*, (Factor-1) (B) *Bifidobacterium spp.*, (Factor-1) (C) *Lactobacillus spp.* and *Bifidobacterium spp.* together (Factor-1 and Factor-2)

a) Pathogens cultured on RCM medium

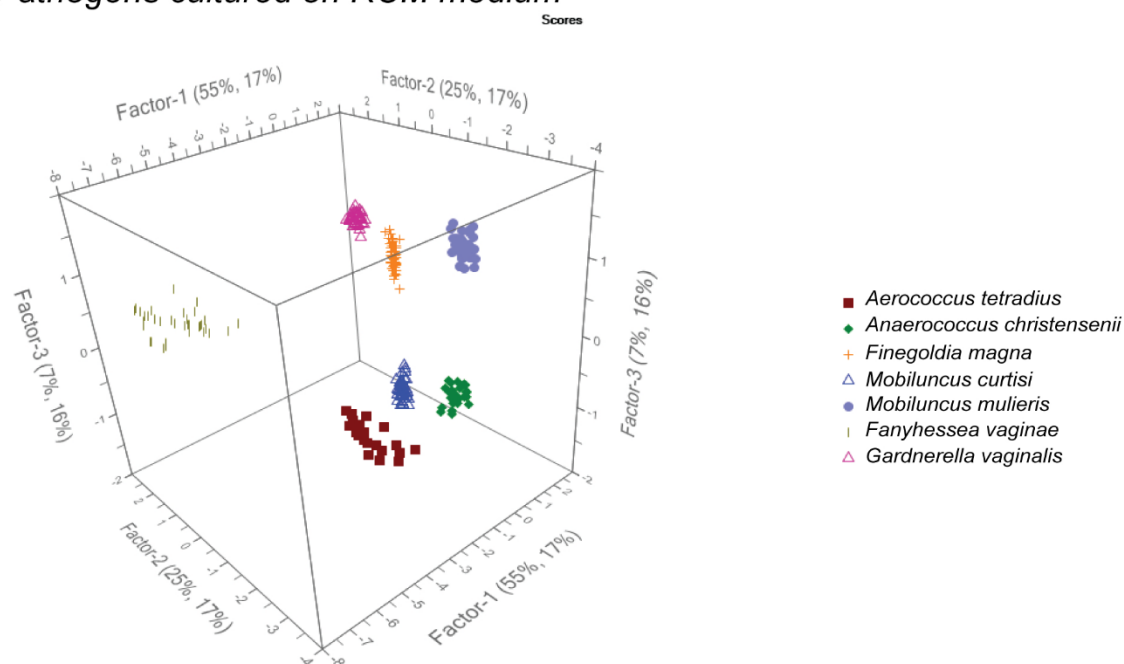

b) Pathogens cultured on TSA medium

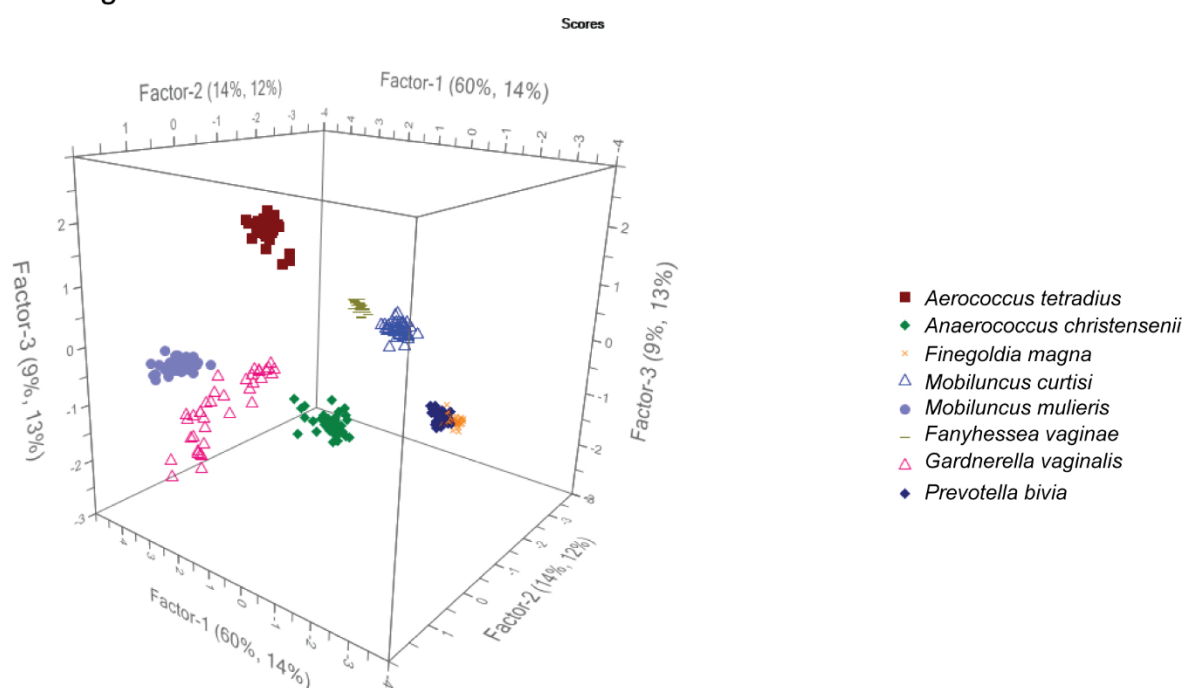

**Figure S3.** PLSR results in the form of score plots calculated for spectra of pathogenic bacteria that grown on (a) RCM and (b) TSA medium.

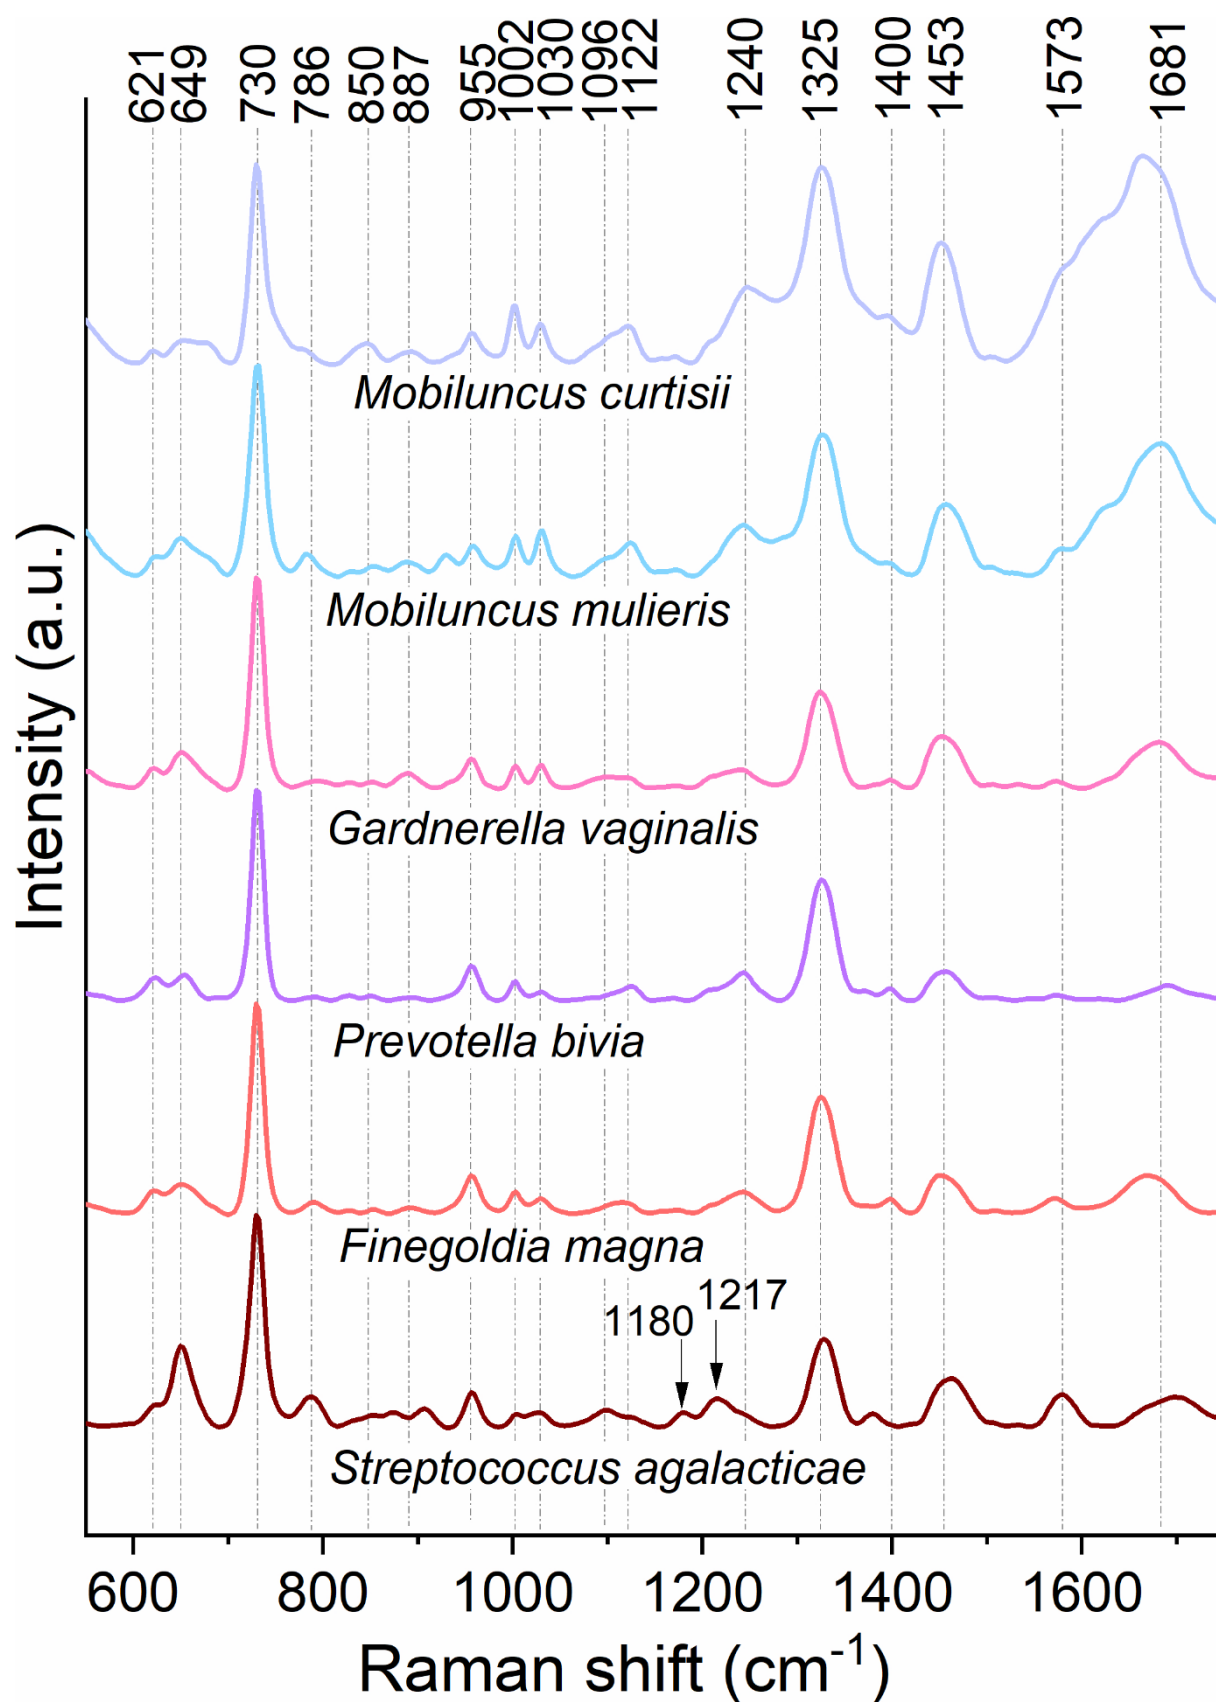

**Figure S4.** SERS spectra for pathogens that were cultured on chocolate medium



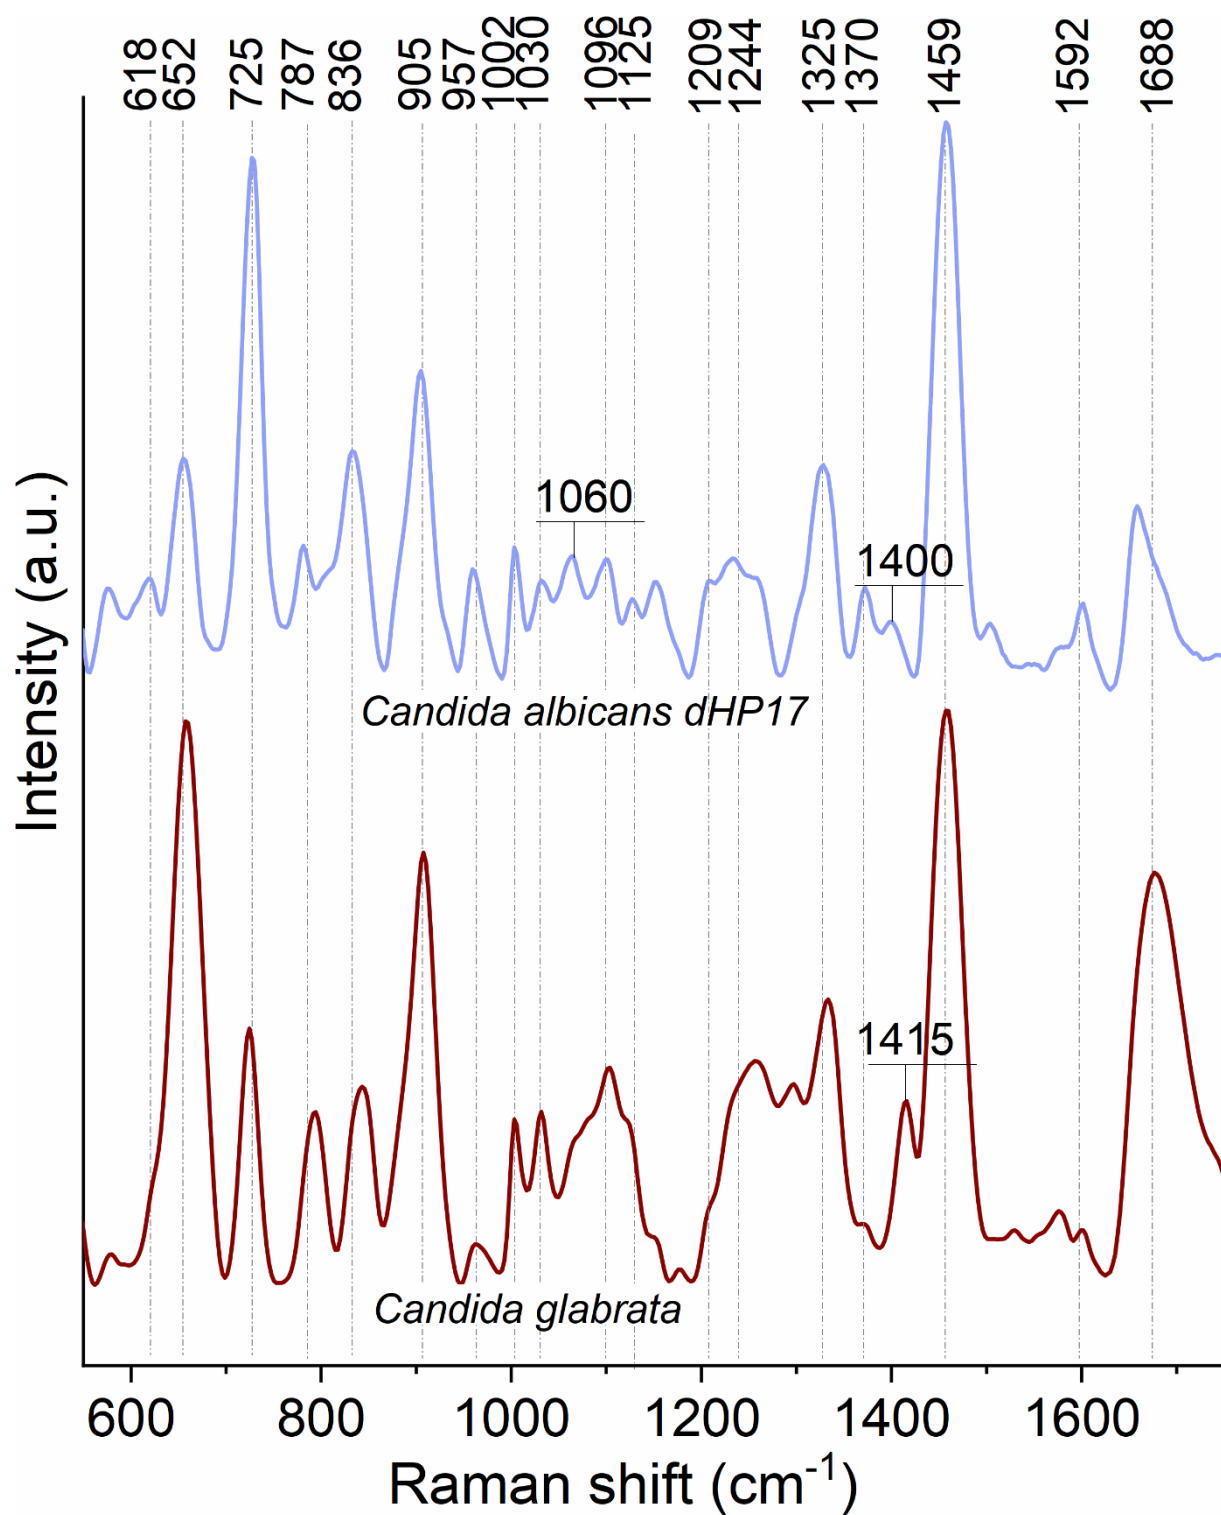

**Figure S5.** The SERS spectra for *C. glabrata*, *C. albicans dHP17* that were cultivated for 48h on MRS agar
